# Supplementary material
Source: publisher figshare collection journal article supplement (https://acs.figshare.com/ndownloader/files/4647964)
Supplement: Supplementary file 1 [file 4647964]

### **Supporting Information:**

Title: "On the Structural Role of the Aromatic Residue Environment of the Chlorophyll a in the Cytochrome b6f Complex"

Author(s): Yan, Jiusheng; Cramer, William A.; Savikhin, Sergei; Dashdorj, Naranbaatar; Baniulis, Danas; Yamashita, Eiki

Fig. S1-S3 represent the original absorption difference profiles probed at 9 wavelengths ranging from 660 nm to 700 nm for WT<sup>HS</sup> (Fig. S1), b6-Y112F (Fig. S2) and IV-F133L/F135L (Fig. S3) samples. For each sample, the data was fit globally with 3-4 decay components common to all 9 profiles, and varying amplitudes. The amplitudes for these components were then assembled into decay associated spectra (DAS), as shown in Fig. 3 of the manuscript. The original experimental profiles are overlapped with the fits to the data (smooth curves).

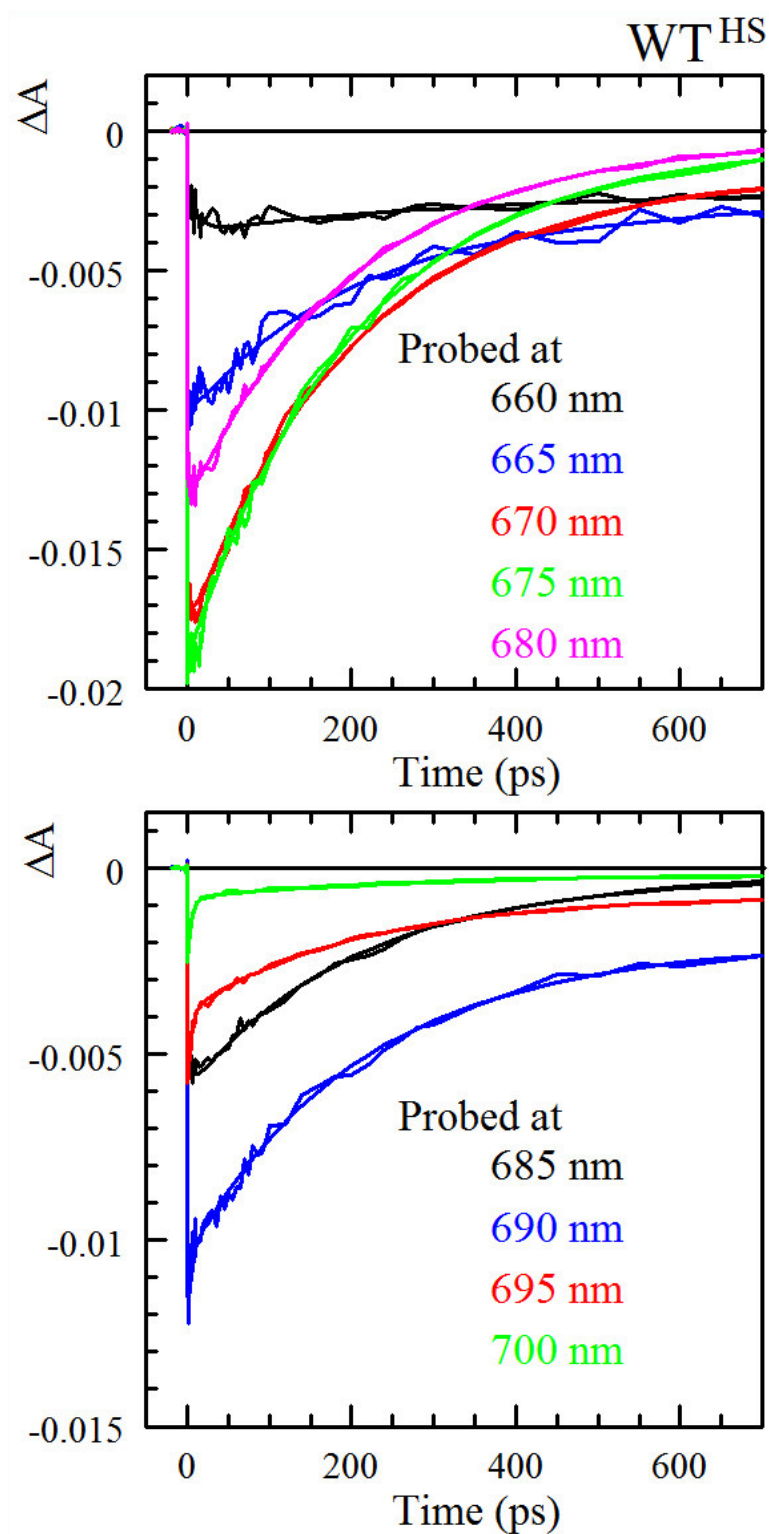

Figure S1

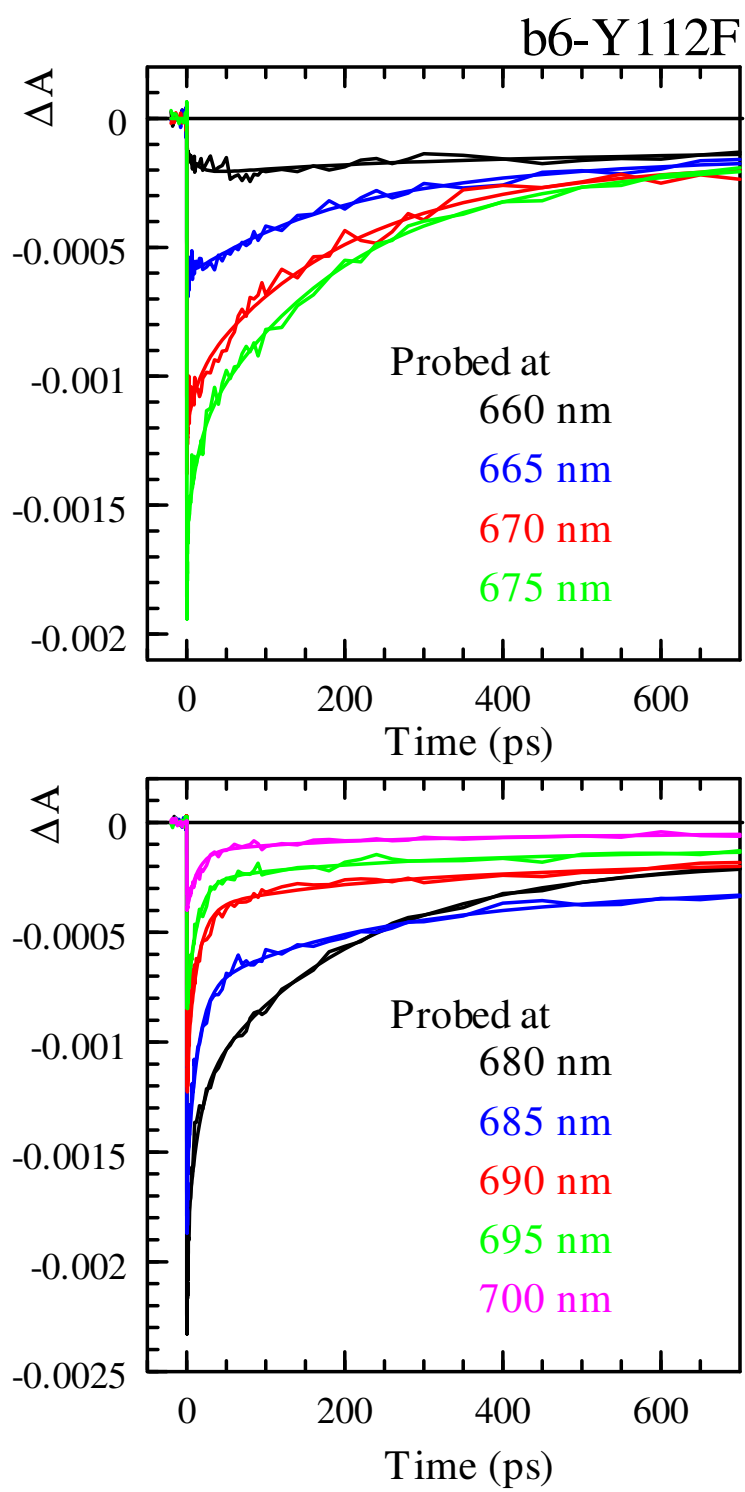

Figure S2

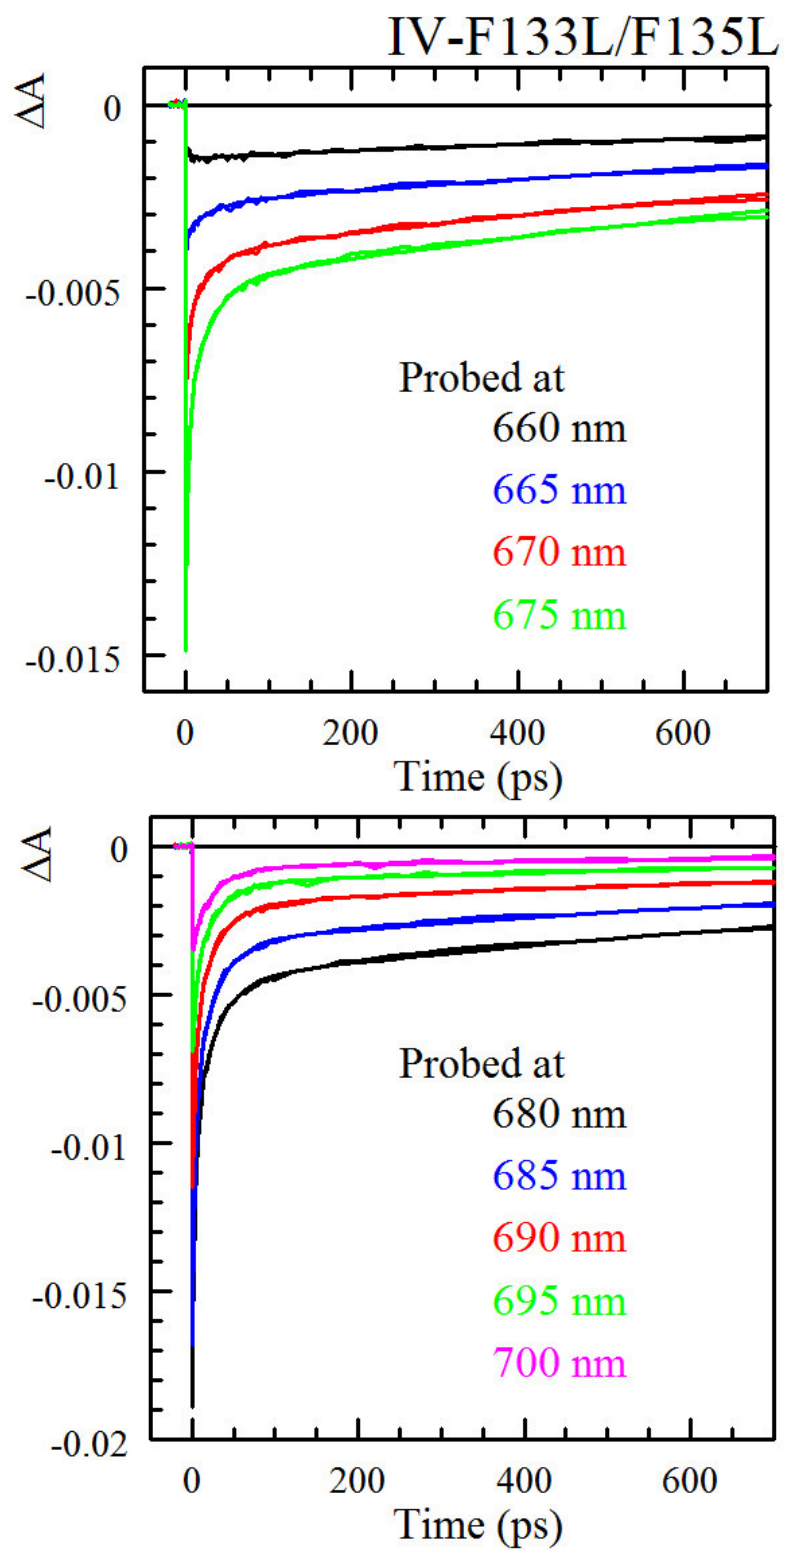

Figure S3
